# Supplementary figures and images for: Adaptive reorientation of endothelial collectives in response to strain
Source: Royal Society of Chemistry journal article supplement (doi:10.1039/c8ib00092a), 2018-01-01

**A**

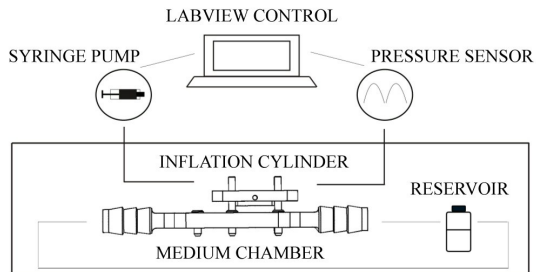

**B**

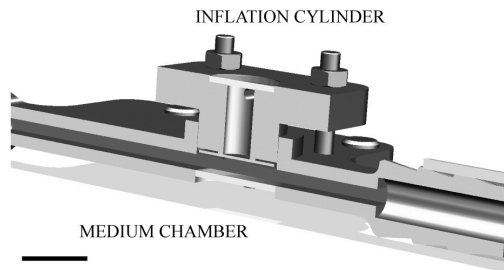

**C**

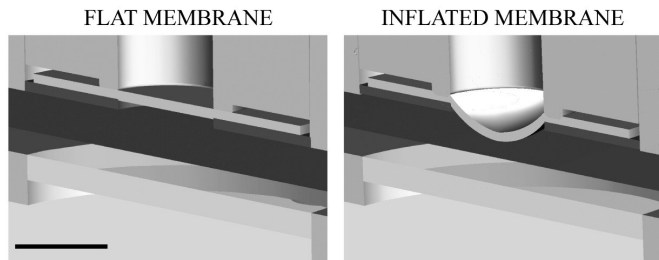

Supplement: c8ib00092a3.pdf [file c8ib00092a3.pdf]

**A**

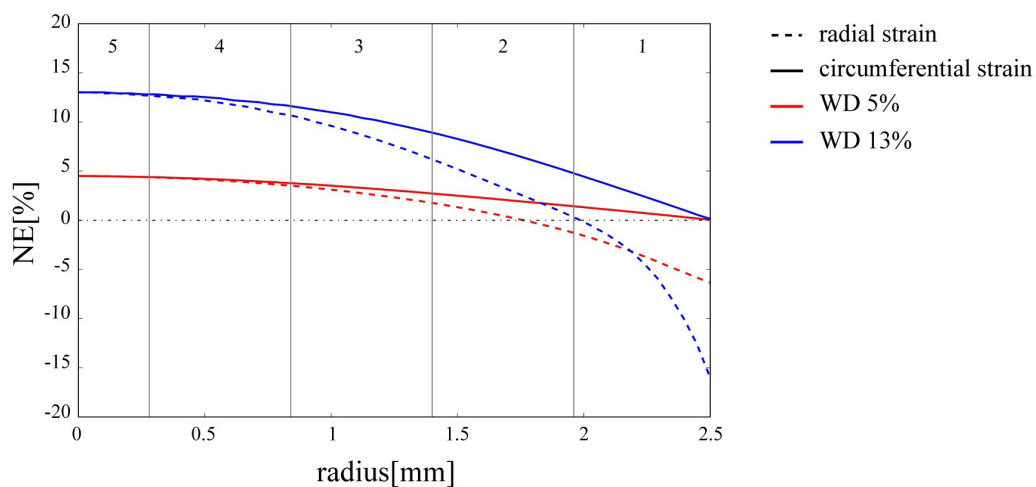

**B**

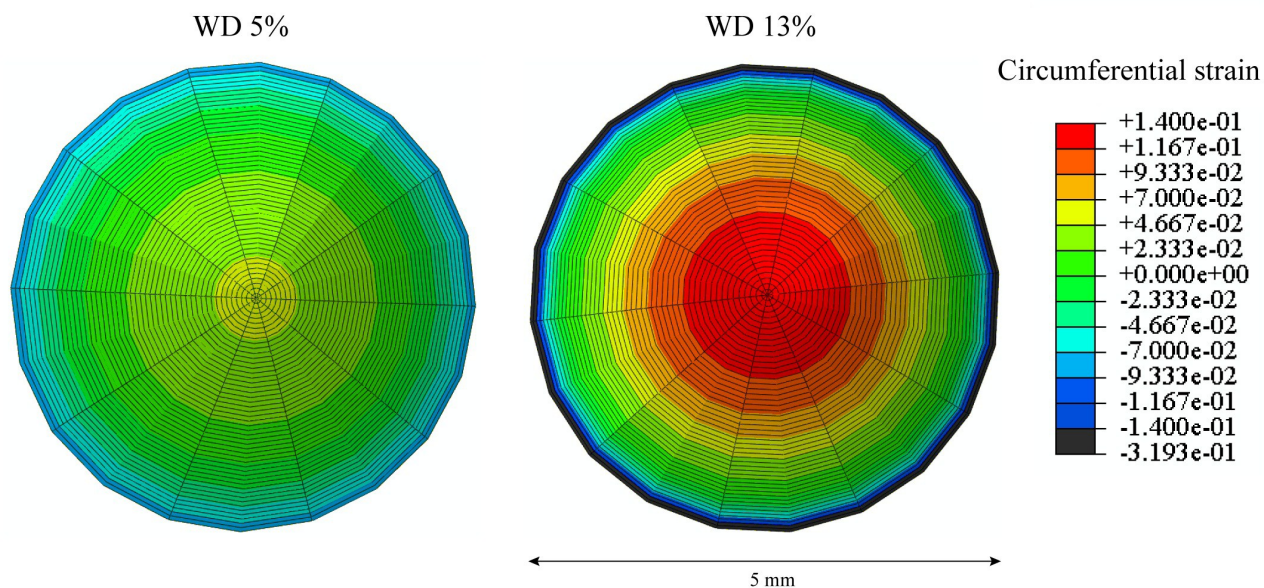

**C**

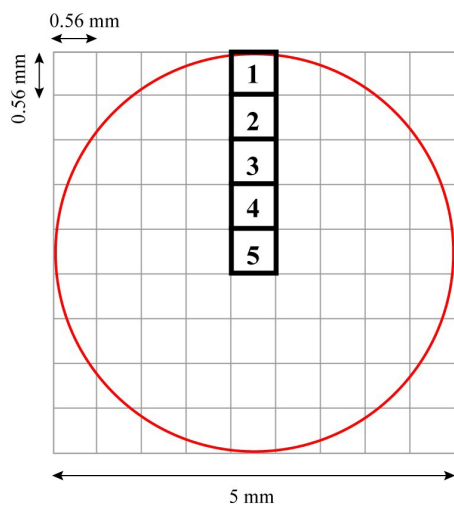

Supplement: c8ib00092a4.pdf [file c8ib00092a4.pdf]
